# Supplementary material for: Transcriptional complexity and roles of Fra-1/AP-1 at the uPA/Plau locus in aggressive breast cancer
Source: PubMed Central journal article supplement (PMC4176185; doi:10.1093/nar/gku814), 2014-09-08
Supplement: supp_gku814_nar-03124-v-2013-File008.pdf [file supp_gku814_nar-03124-v-2013-File008.pdf]

**Supplementary Data S1**  
**primer sequences used for PCR and qPCR**

| <b>position</b> | <b>name</b> | <b>orientation</b> | <b>sequence 5'-3'</b>     |
|-----------------|-------------|--------------------|---------------------------|
| -5.5            | MP4034      | sense              | TCCAAACCCTCCTCAGAGGCTCAGC |
|                 | MP4035      | antisense          | TCCCTTTTCCCGATCACCATCCATC |
| -4.1            | MP4029      | sense              | TCAGTGCCTGCCGTTGCCAGC     |
|                 | MP4031      | antisense          | TGCCGTTGCCAGCTGGCTTCA     |
| -2.8            | MP3390      | sense              | CCCTCCCTTCACAGCGTTCTG     |
|                 | MP3391      | antisense          | GATGAGCAGCAAAGCCAGCAC     |
| -1.9            | MP3169      | sense              | AAGGGGAGAAAGGGTGTACGCTT   |
|                 | MP3170      | antisense          | CAGCCTGAGGACTTACCCCGAAAC  |
| -1.3            | MP4132      | sense              | CGAGTCCTACTGGGTTCAAATGAC  |
|                 | MP4133      | antisense          | ACACACACACACACACACGCATCTC |
| -0.3            | MP3394      | sense              | CCAGCGGGGAGAAGTTGCAGA     |
|                 | MP3395      | antisense          | TCTCCGTGCTTCCTCCCATGC     |
| 0.4             | MP3396      | sense              | CCCAGAGAGGAGAGAGACAGC     |
|                 | MP3397      | antisense          | GACCAGGACGCAGAGAAGCAG     |
| 1.4             | MP3452      | sense              | GTGAGGTGGGGTTGGAAGGAG     |
|                 | MP3453      | antisense          | AGGGTTACACCATGTTGTCCAGG   |
| 2.2             | MP3400      | sense              | TGAGGGGAGGAGGCAGGGAAG     |
|                 | MP3401      | antisense          | CACCCCACTGTCATCAGCAGG     |
| 3.5             | MP3402      | sense              | GCCTAACTACCTCAGCTGGGA     |
|                 | MP3403      | antisense          | TAGGTCAGTCATCCAGGGAGG     |
| 4.3             | MP3404      | sense              | CCCCACTACTACGGCTCTGAA     |
|                 | MP3405      | antisense          | CACCCTTAAGCTGGCTGGAAC     |
| 4.8             | MP3406      | sense              | GGTGGGGAGGAGAACTAGGGT     |
|                 | MP3407      | antisense          | CATGAGCCACTGTGCCTGACG     |
| 5.3             | MP3163      | sense              | TGTTCCCTCCAAGGCCGCATGA    |
|                 | MP3164      | antisense          | TGGTGTGACTGCGGATCCAGGGTAA |
| 5.5             | MP3408      | sense              | CCCGCTTCTTGCTGGTTGTC      |
|                 | MP3409      | antisense          | CTGGTGGGTGGCACAGGCAA      |

Primers used in Figure 2B, Figure 3 all panels, Figure 5E  
and Figures 6A, 6B, 6C

| <b>amplicon</b> | <b>name</b> | <b>orientation</b> | <b>sequence 5'-3'</b>    |
|-----------------|-------------|--------------------|--------------------------|
| 1               | MP3169      | sense              | AAGGGGAGAAAGGGTGTACGCTT  |
|                 | MP3170      | antisense          | GCAGCCTGAGGACTTACCCCGAAA |
| 2               | MP3396      | sense              | CCCAGAGAGGAGAGAGACAGC    |
|                 | MP3397      | antisense          | GACCAGGACGCAGAGAAGCAG    |
| 3               | MP3169      | sense              | AAGGGGAGAAAGGGTGTACGCTT  |
|                 | MP3397      | antisense          | GACCAGGACGCAGAGAAGCAG    |

Primers used in Figure 4B

| <b>amplicon</b> | <b>name</b> | <b>orientation</b> | <b>sequence 5'-3'</b>     |
|-----------------|-------------|--------------------|---------------------------|
| Plau-004        | MP3169      | sense              | AAGGGGAGAAAGGGTGTACGCTT   |
|                 | MP3170      | antisense          | CAGCCTGAGGACTTACCCGAAAC   |
| Plau-001        | MP3292      | sense              | ATTGGGGGAGAATTCACCACCATC  |
|                 | MP3293      | antisense          | CTGATGAGGCTGCCTCCACACACGT |

Primers used in Figures 1A, 1D, 1F, 1H, in Figure 2G,  
in Figures 4C, 4E and in Figures 6D, 6E

| <b>position</b> | <b>name</b> | <b>orientation</b> | <b>sequence 5'-3'</b>       |
|-----------------|-------------|--------------------|-----------------------------|
| -4.9            | MP4249      | sense              | CACCCAACATGGTAACCAGAACTCT   |
|                 | MP4250      | antisense          | CTCACCAGGAACCAAAGTTAGGCC    |
| -4.4            | MP4251      | sense              | AGGCAGAAAAAGAGTGAGGAAGGTT   |
|                 | MP4252      | antisense          | CATGAAAGGGGAACATAAGCTGGTC   |
| -4.1            | MP4253      | sense              | CCGTACCTCCTTCCCAGAACTGTTG   |
|                 | MP4254      | antisense          | AAGCGCCTCTTCCCTCCTACACAT    |
| -2.8            | MP4257      | sense              | CCCTCCCTTACAGCGTTCGTCTT     |
|                 | MP4258      | antisense          | CCCAGCGTCTTCTGATCCTTGTTCC   |
| -1.95           | MP3169      | sense              | AAGGGGAGAAAGGGTGTACGCTT     |
|                 | MP4238      | antisense          | GCTCCCCTAGCAGCTCTCATGACTC   |
| -1.93           | MP3169      | sense              | AAGGGGAGAAAGGGTGTACGCTT     |
|                 | MP4239      | antisense          | CAGGAAATCCCAGGGACCGTCATG    |
| -1.88           | MP3998      | sense              | TGAATCATGACGGTCCCTGGG       |
|                 | MP4240      | antisense          | CCTGAGGACTTACCCGAAACTCCC    |
| -1.84           | MP3998      | sense              | TGAATCATGACGGTCCCTGGG       |
|                 | MP4241      | antisense          | CAGTTTGTGTTGGATTTGAGAACCC   |
| -1.5            | MP4290      | sense              | GAGCCTTCCTCCTTCCCTACCTTCCCT |
|                 | MP4291      | antisense          | TGGGTCCACCTGAGAGTGACAGAAG   |
| -1.3            | MP4263      | sense              | CCTGACACTAGGGGAAAGAGATGGG   |
|                 | MP4264      | antisense          | GCACACTTGGAGGAACATAGCAGGG   |
| -0.8            | MP4265      | sense              | TCCCAAAAGACCCGTTAACTTCA     |
|                 | MP4266      | antisense          | TACAGGATTGTGGGAACAAAGTCCT   |
| -0.3            | MP4267      | sense              | ACTGATTAGAGGACCCAGGAGGCT    |
|                 | MP4268      | antisense          | AGTCCCCGAATTGCAGAGAGGAGAG   |
| 2.2             | MP3400      | sense              | TGAGGGGAGGAGGCAGGGAAG       |
|                 | MP3401      | antisense          | CACCCACTGTCATCAGCAGG        |
| 5.3             | MP3163      | sense              | TGTTCCCTCCAAGCCGCATGA       |
|                 | MP3164      | antisense          | TGGTGTGACTGCGGATCCAGGGTAA   |

Primers used in Figures 5B, 5C and in Figure 6F

| <b>amplicon</b> | <b>name</b> | <b>orientation</b> | <b>sequence 5'-3'</b>    |
|-----------------|-------------|--------------------|--------------------------|
| 1               | MP3394      | sense              | CCAGCGGGGAGAAGTTGCAGA    |
|                 | MP3395      | antisense          | TCTCCGTGCTTCCTCCCATGC    |
| 2               | MP3400      | sense              | TGAGGGGAGGAGGCAGGGAAG    |
|                 | MP3401      | antisense          | CACCCCACTGTCATCAGCAGG    |
| 3               | MP3408      | sense              | CCCGCTTTCTTGCTGGTTGTC    |
|                 | MP3409      | antisense          | CTGGTGGGTGGCACAGGCAAA    |
| 4               | MP4132      | sense              | CGAGTCCACTGGGTTCAAAATGAC |
|                 | MP3395      | antisense          | TCTCCGTGCTTCCTCCCATGC    |
| 5               | MP3169      | sense              | GTCTCAGCAATCAGCATGACAGCC |
|                 | MP3395      | antisense          | TCTCCGTGCTTCCTCCCATGC    |
| 6               | MP3167      | sense              | AAGGGGAGAAAGGGTGTACGCTTC |
|                 | MP3395      | antisense          | TCTCCGTGCTTCCTCCCATGC    |
| 7               | MP3390      | sense              | CCCTCCCTTCACAGCGTCTG     |
|                 | MP3395      | antisense          | TCTCCGTGCTTCCTCCCATGC    |
| 8               | MP4029      | sense              | TCAGTGCTGCGGTTGCCAGC     |
|                 | MP3395      | antisense          | TCTCCGTGCTTCCTCCCATGC    |
| 9               | MP3400      | sense              | TGAGGGGAGGAGGCAGGGAAG    |
|                 | MP3409      | antisense          | CTGGTGGGTGGCACAGGCAAA    |

### Primers used in Figure 5D

| <b>amplicon</b> | <b>name</b> | <b>orientation</b> | <b>sequence 5'-3'</b>     |
|-----------------|-------------|--------------------|---------------------------|
| 1               | MP3169      | sense              | AAGGGGAGAAAGGGTGTACGCTT   |
|                 | MP3397      | antisense          | GACCAGGACGCAGAGAAGCAG     |
| 2               | MP3169      | sense              | AAGGGGAGAAAGGGTGTACGCTT   |
|                 | MP3293      | antisense          | TGATGAGGCTGCCTCCACACACGTA |
| 3               | MP3169      | sense              | AAGGGGAGAAAGGGTGTACGCTT   |
|                 | MP3409      | antisense          | CTGGTGGGTGGCACAGGCAAA     |

### Primers used Figure 4D

## Supplementary Data S2

| Position     | Sequence        |
|--------------|-----------------|
| -6347        | TGCCTCA         |
| <b>-5394</b> | <b>TGTGTCA</b>  |
| -5347        | TGAATGA         |
| <b>-5329</b> | <b>TGATTCA</b>  |
| <b>-5056</b> | <b>TTAGTCA</b>  |
| -4775        | TGCCTCA         |
| -4650        | TGGATCA         |
| -4641        | CGCCTCAG        |
| -4605        | TGAGCCA         |
| <b>-4562</b> | <b>TGACTTA</b>  |
| -4543        | TGGGTCA         |
| <b>-4508</b> | <b>AGACTCA</b>  |
| <b>-4301</b> | <b>TGAGTAA</b>  |
| -4130        | AGACTCA         |
| <b>-3859</b> | <b>TGAGTCA</b>  |
| -3677        | TGAGGCA         |
| -3287        | TGACTCCA        |
| -3269        | TGGGTCA         |
| <b>-3111</b> | <b>TGACTCA</b>  |
| -3052        | GGAGTCA         |
| -2834        | TGGATCA         |
| -2370        | TGAGGCA         |
| <b>-1968</b> | <b>TGAAGTCA</b> |
| <b>-1886</b> | <b>TGAATCA</b>  |
| <b>-1695</b> | <b>TGACTCA</b>  |
| -1630        | TGGGCTCA        |
| -1388        | GGACTCA         |
| 76           | TGCCGCA         |
| 200          | GGAGTCA         |
| 503          | TGACTGA         |
| 731          | TGGGTCA         |
| 2241         | TGACTGC         |
| 2972         | TGACACG         |
| 3608         | TGACTTA         |
| <b>4186</b>  | <b>TGACTCA</b>  |
| <b>4240</b>  | <b>TGACCCA</b>  |
| 4523         | TAACTCA         |
| 4829         | TGCGTCA         |
| 4894         | TGAGGCA         |
| <b>5017</b>  | <b>TGAGACA</b>  |
| <b>5068</b>  | <b>TCACGTCA</b> |
| 5263         | AGACTCA         |
| <b>5497</b>  | <b>AGAGTCA</b>  |
| <b>5660</b>  | <b>TGACTCA</b>  |
| 5999         | TGAGTAA         |

**Compilation of putative AP-1 DNA binding sites at the Plau locus.** AP-1 sites were compiled from -6.5 kb to the end of the 3'UTR using the Jaspar (<http://jaspar.cgb.ki.se/>), Matinspector ([http://www.genomatix.de/online\\_help/help\\_matinspector/matinspector\\_help.html](http://www.genomatix.de/online_help/help_matinspector/matinspector_help.html)), and Alibaba2 (<http://www.gene-regulation.com/pub/programs/alibaba2/index.html>) softwares. Only sites found in at least two of the databases are reported. Those found in all of them are in bold. Positions are numbered with respect to the Plau-001 TSS.

## Supplementary data 3

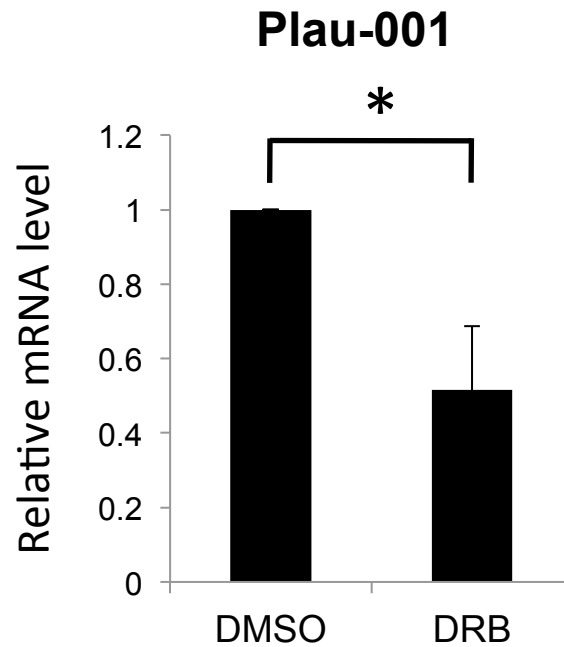

**Effect of DRB on Plau-001 expression.** MDA-MB231 cells were incubated for 8 hrs in presence of DRB ( $65\mu\text{M}$ ) or DMSO as a control. RT-qPCR were carried out as in Figure 1D. Plau-001 mRNA abundance was arbitrarily set to 1 in cells incubated with DMSO for calculation of mean values. Values are the means of 3 independent experiments and error bars indicate standard deviations. The result of the Student's paired t-test is indicated on the graphs.

## Supplementary data 4

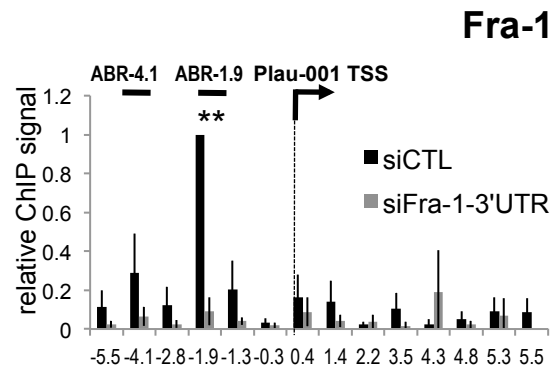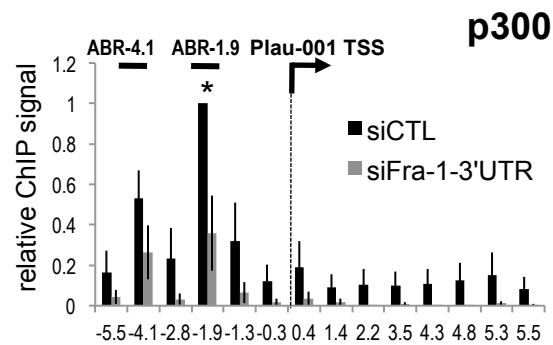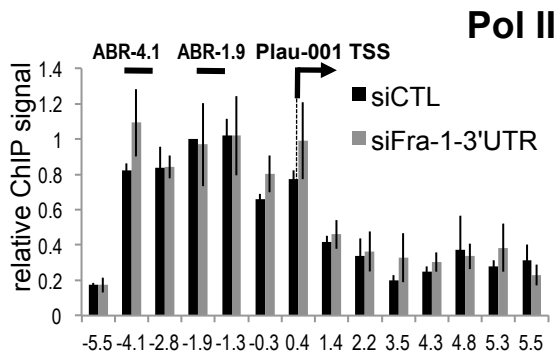

**Effect of Fra-1 knockdown on the uPA locus.** *Distribution of Fra-1, p300 and Pol II on the Plau locus.* ChIPs were conducted in MDA-MB231 cells 48h after transfection of either a control siRNA (siCTL) or of the anti-Fra-1-3'UTR siRNA using specific antibodies (see Materials and Methods) directed to Fra-1, p300 or to the RPB1 subunit of Pol II. Values are the means of 3 independent experiments. Bars indicate standard deviations. Results of the Student's paired t-test are indicated on the graphs

## Supplementary Data 5

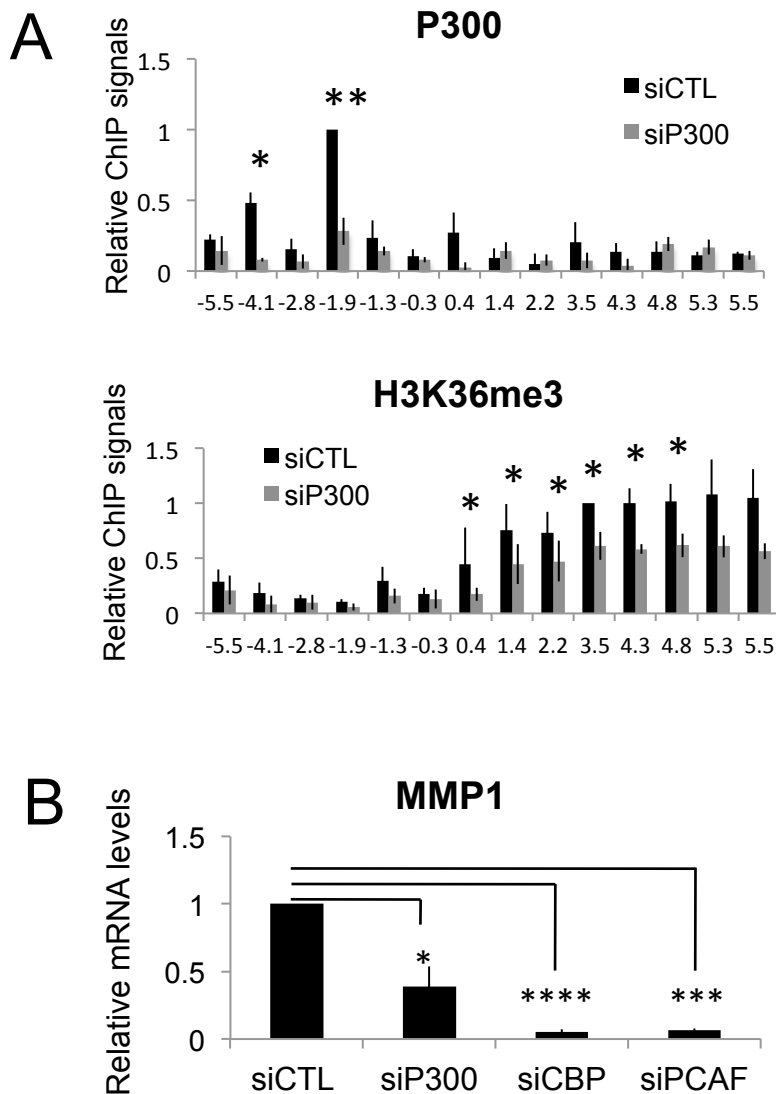

- A) Effect of p300 siRNA-mediated knock down on H3K36me<sub>3</sub> levels on the uPA locus in MDA-MB231 cells.** Cells were transfected for 48 hours with a siRNA directed to p300 (see Materials and Methods). ChIP experiments were conducted as described in Materials and Methods using antibodies specific for p300 (upper panel) or H3K36me<sub>3</sub> (lower panel). Values are the means of 3 independent experiments. For mean calculations, values were normalized to that of amplicon -1.9 (upper panel) or to that of amplicon 3.5 (lower panel), arbitrarily set to 1, in cells transfected with the siCTL. Results of the Student's paired t-test are indicated on the graphs.
- B) Effect of p300, CBP and pCAF on MMP1 mRNA levels.** MDA-MB231 cells were transfected with either a control siRNA (siCTL) or siRNAs directed to p300, CBP or pCAF. 48 h after transfection, RT-qPCR were carried out using the following forward and reverse primers : MP3048 TTTCCTCCACTGCTGCTGCTGCTG and MP3049 CTTTCAACTTGCCTCCCATCATTCTTCA. MMP1 mRNA abundance was arbitrarily set to 1 in siCTL-transfected cells for calculation of mean values. Values are the mean of 3 independent experiments. Results of the Student's paired t-test are indicated on the graphs.

## Supplemental Data 6

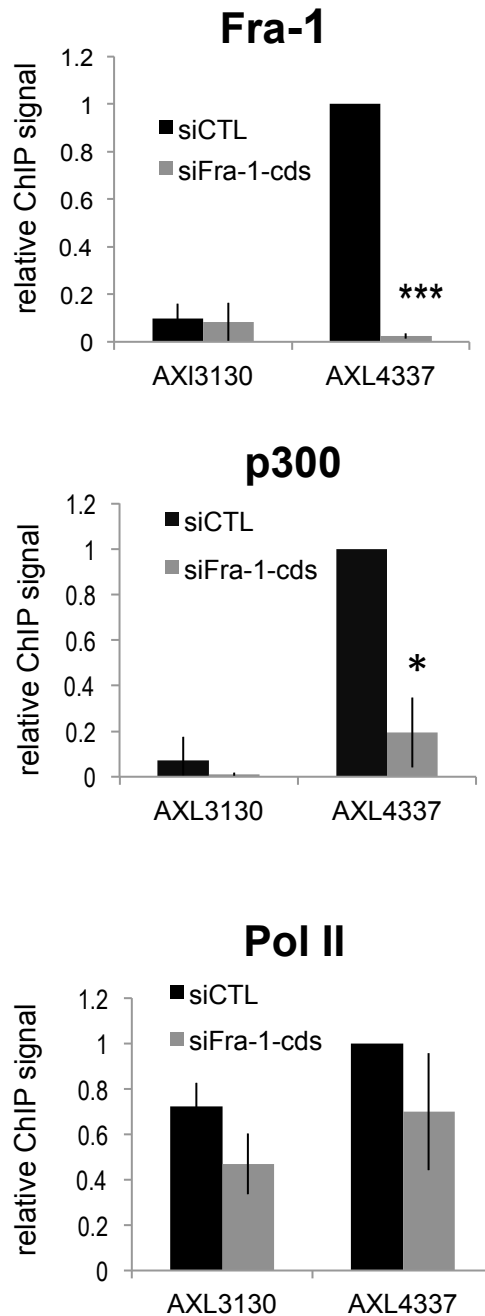

**Effect of Fra-1 knockdown on the AXL locus.** *Distribution of Fra-1, p300 and Pol II on specific domains containing (AXL4337) or not (AXL3130) AP-1 sites on the AXL gene.* ChIPs were conducted in MDA-MB231 cells 48h after transfection of either a control siRNA (siCTL) or of the anti-Fra-1-cds siRNA using specific antibodies directed to Fra-1, p300 or the RPB1 subunit of Pol II. Values are the means of 3 independent experiments. Bars indicate standard deviations. Results of the Student's paired t-test are indicated on the graphs. Primers to amplify the AXL 3130 and AXL 4337 amplicons are respectively : MP3960 CTCTCCCTCCATTCACCCCGG / MP 3961 : AGGGCTGACAAAGGGGCACCA and MP3950 : GCATCAGCTTCCCGCACTCCC / MP3951: CATGCCCGATCCCCAACCCTG



## Supplementary data 7

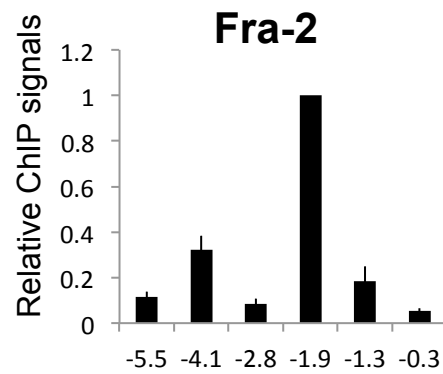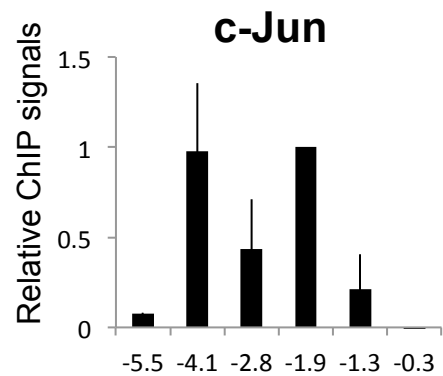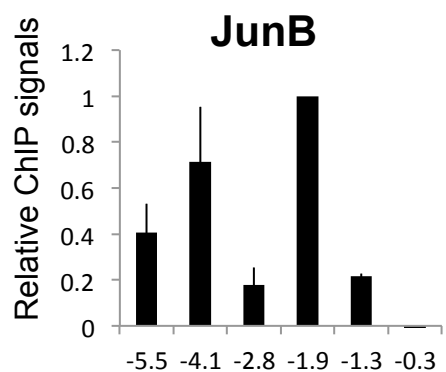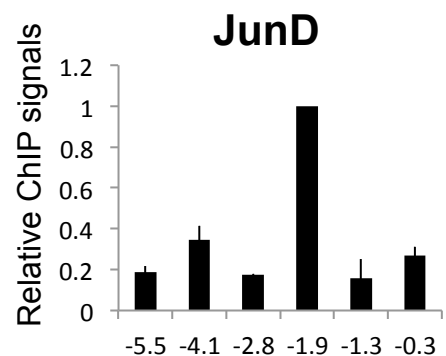

**Distribution of Fra-1, c-Jun, JunB and JunD on the Plau locus.** ChIP experiments were conducted in MDA-MB231 cells using antibodies specific for Fra-2 (sc-1317X, Santa Cruz Biotechnology), c-Jun (sc1694X, Santa Cruz Biotechnology), JunB (C37F9, Cell Signaling Technology) and JunD (sc74X, Santa Cruz Biotechnology) as described in Materials and Methods. Values are the mean of 2 independent experiments. For the calculations of means, all values were normalized to that of the amplicon -1.9, arbitrarily set to 1.
